# Supplementary material for: Selective and sensitive non-enzymatic detection of glucose by Cu(ii)–Ni(ii)/SBA-15
Source: Royal Society of Chemistry journal article supplement (doi:10.1039/d4nj00039k), 2024-01-01
Supplement: d4nj00039k1.pdf [file d4nj00039k1.pdf]

## SUPPLEMENTARY INFORMATION

### Selective and Sensitive Non-Enzymatic Glucose Detection by Cu(II)-Ni(II)/SBA-15

Athira M P<sup>a</sup>, Arun R<sup>a</sup>, Suja Haridas<sup>a,b</sup>

<sup>a</sup> Department of Applied Chemistry, Cochin University of Science and Technology, Kochi, Kerala, India.

<sup>b</sup> Inter-University Centre for Nanomaterials and Devices, Cochin University of Science and Technology, Kochi, Kerala, India

[sujaharidas@cusat.ac.in](mailto:sujaharidas@cusat.ac.in)

**Table S1:** Structural and textural parameters of the catalytic system

| Systems          | BET surface area (m <sup>2</sup> g <sup>-1</sup> ) | Pore volume (cm <sup>3</sup> g <sup>-1</sup> ) | Pore diameter (nm) | d <sub>100</sub> (nm) | a <sub>0</sub> = {2/(3) <sup>0.5</sup> } * d <sub>100</sub> (nm) | Wall thickness (nm) |
|------------------|----------------------------------------------------|------------------------------------------------|--------------------|-----------------------|------------------------------------------------------------------|---------------------|
| SBA-15           | 529                                                | 0.753                                          | 5.63               | 9.07                  | 10.47                                                            | 9.71                |
| 30Cu-20Ni/SBA-15 | 144                                                | 0.305                                          | 8.52               | 8.91                  | 10.28                                                            | 1.76                |

**Table S2:** Comparison of the performance of the 30Cu-20Ni/ SBA-15 modified glassy carbon electrode with other reported glucose sensors.

|    | Electrode based on                       | Applied Potential (V) | Linear range                                 | Detection limit (μM) | Reference |
|----|------------------------------------------|-----------------------|----------------------------------------------|----------------------|-----------|
| 1  | PCFCuNP                                  | +0.35                 | 6.6-1300 μM                                  | 2.2                  | 10        |
| 2  | CuO/MWCNTs                               | +0.40                 | 0.4μM-1.2mM                                  | 0.2                  | 17        |
| 3  | CNT-Ni nanocomposite                     | +0.50                 | 5 μM-2 mM                                    | 2                    | 18        |
| 4  | Ni-Cu/CNT/GCE                            | +0.50                 | 0.025-800 mM                                 | 0.025                | 19        |
| 5  | NiCFP                                    | +0.60                 | 0.002-2.5 mM                                 | 1                    | 20        |
| 6  | Cu/Cu <sub>2</sub> O/CuO HSs/GCE         | +0.55                 | 0.5 μM-30 mM                                 | 0.39                 | 21        |
| 7  | CuO/GO/GCE                               | +0.70                 | 2.79 μM-2.03mM                               | 0.69                 | 23        |
| 8  | Hierarchical NiO superstructures/foam Ni | +0.55                 | 18-1200μM                                    | 6.15                 | 24        |
| 9  | Cu-Ni NTNW                               | +0.70                 | up to 1.2 mM                                 | 1.2                  | 25        |
| 10 | Cu-SBA-15                                | +0.60                 | 10 μM to 20mM                                | 10                   | 26        |
| 11 | Cu/Ni/graphene                           | +0.61                 | 0.005-0.24 μM<br>0.24 -2.33μM<br>2.33-2174μM | 0.0027               | 27        |
| 12 | Cu-Ag/NF                                 | +0.55                 | 0.005-3.5 mM                                 | 0.08                 | 28        |

|    |                                               |       |                           |       |           |
|----|-----------------------------------------------|-------|---------------------------|-------|-----------|
| 13 | CuNi/fMWCNTs/GCE                              | +0.45 | 0.1-5000 $\mu\text{M}$    | 2.5*  | 29        |
| 14 | Cu-Ni/NF                                      | +0.70 | 1-600 $\mu\text{M}$       | 2     | 32        |
| 15 | Ni(OH) <sub>2</sub> /RGO/Cu <sub>2</sub> O@Cu | +0.65 | 0.5 $\mu\text{M}$ -7.67mM | 0.35  | 39        |
| 16 | Nafion/SBA-15-Cu(II)/GCE                      | +0.50 | 0.5mM-2 mM                | 0.076 | 45        |
| 17 | 30Cu-20Ni/SBA-15/Triton/GCE                   | +0.50 | 10-900 $\mu\text{M}$      | 1.19  | THIS WORK |

\*nM

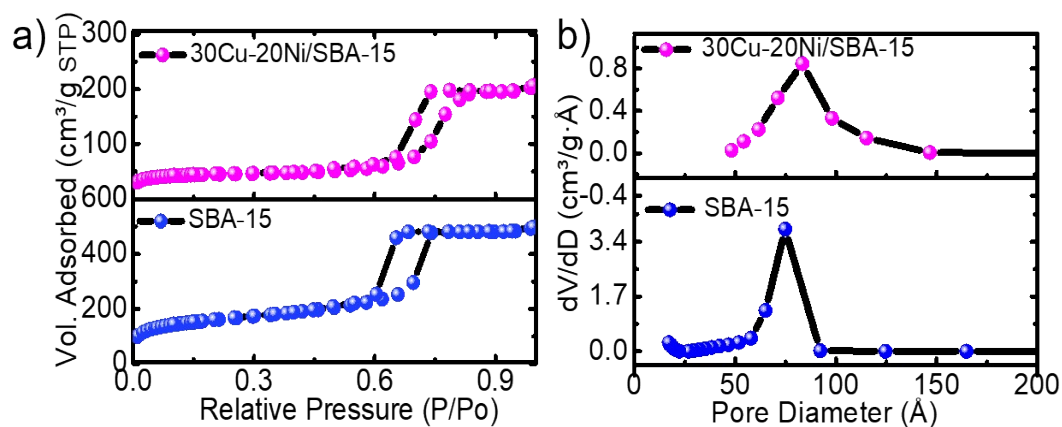

**Figure S1:**BET analysis a) Adsorption isotherm and b) pore volume distribution comparison of SBA-15 and 30Cu-20Ni/SBA-15.

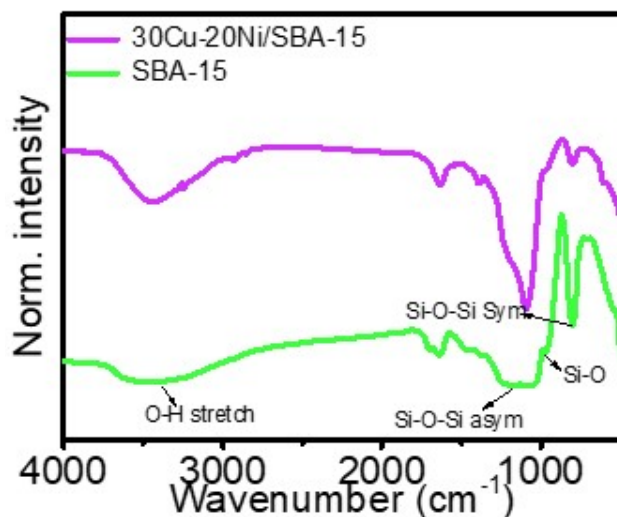

**Figure S2:**FT-IR spectrum of SBA-15 and 30Cu-20Ni/SBA-15.

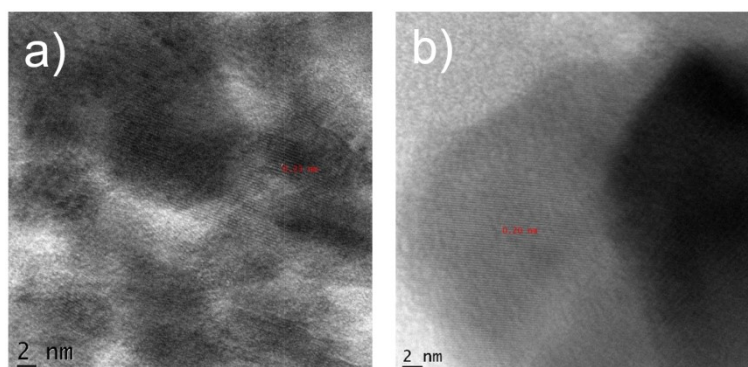

**Figure S3:** HR-TEM images of 30Cu-20Ni/SBA-15, showcasing crystal facets of a) 0.23 for CuO and b) 0.20 nm for NiO

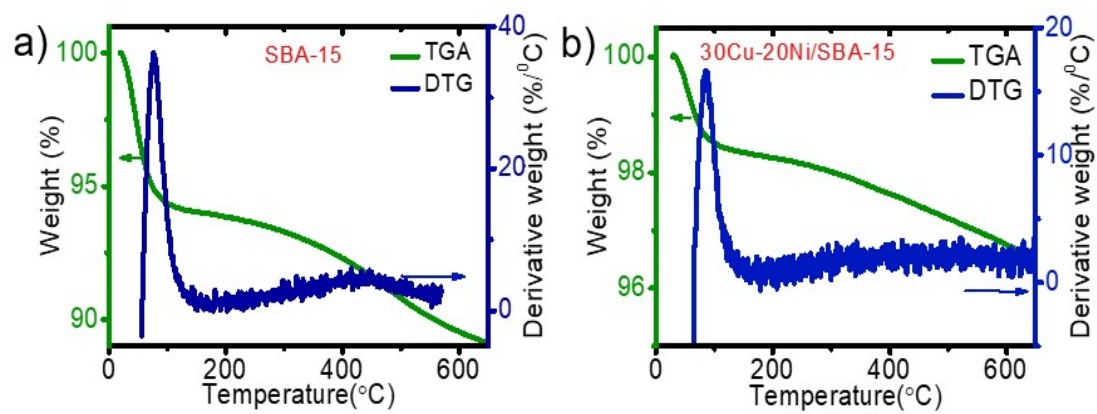

**Figure S4:** TG-DTG comparison of a) SBA-15 and b) 30Cu-20Ni/SBA-15

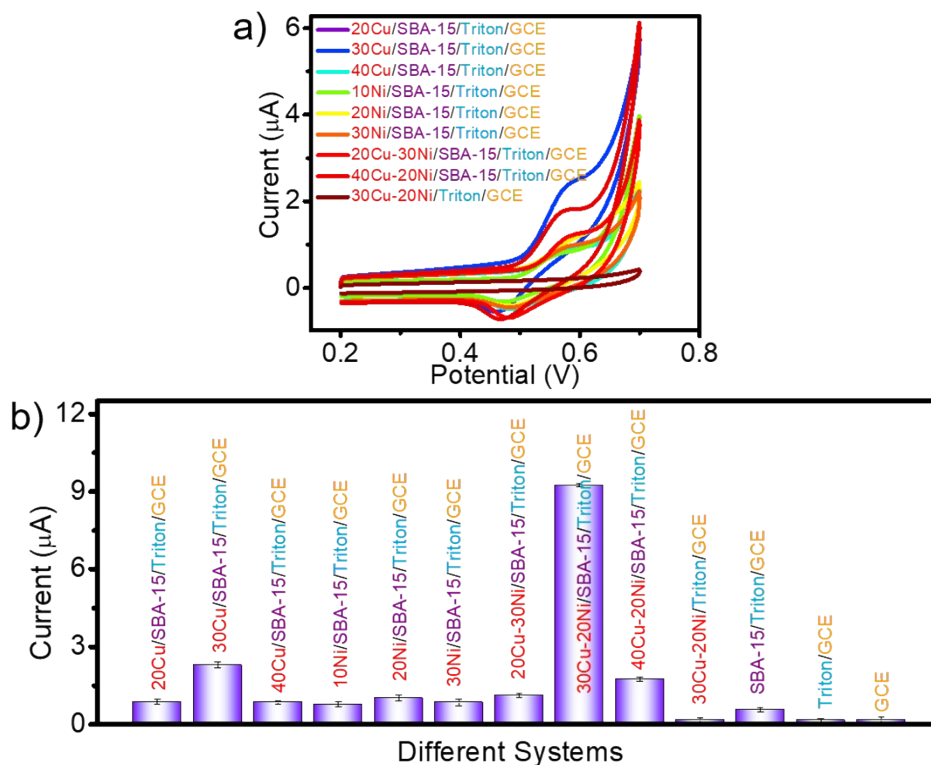

**Figure S5.** a) CV response of diverse composition-modified GCE towards the oxidation of 0.8 mM glucose in a 0.1 M NaOH solution, at a scan rate of 100 mV/s and b) corresponding bar diagram representations showing peak current from CV data

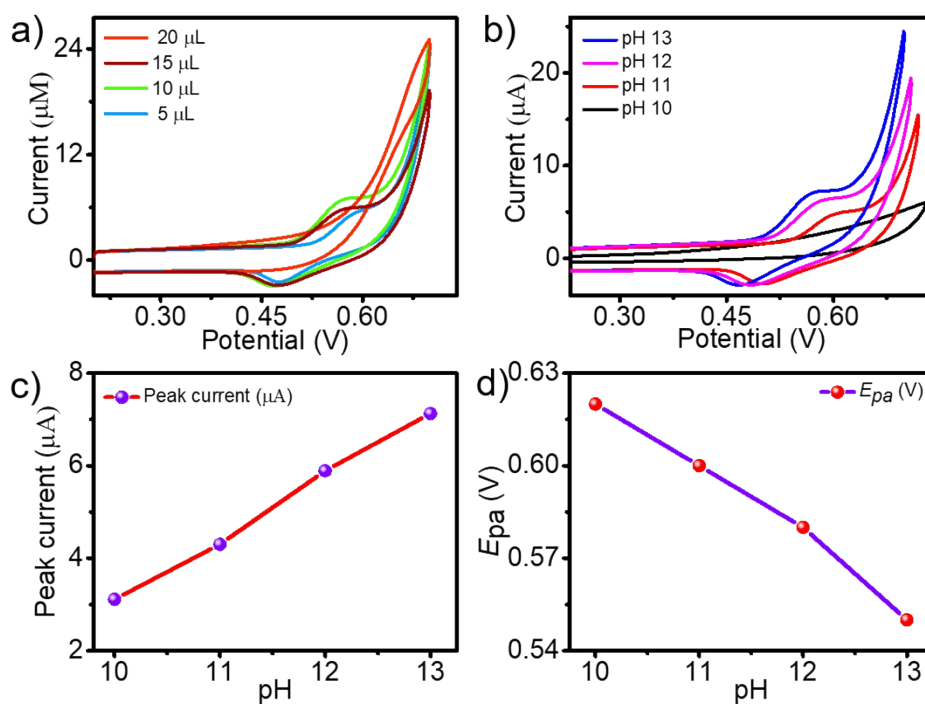

**Figure S6:** CV plot of a) different coating amount in 30Cu-20Ni/SBA-15 modified Glassy Carbon Electrode for the detection of 0.2 mM glucose in 0.1 M NaOH at 0.55 V and b) influence of varying pH values on electrochemical oxidation of 0.5 mM glucose in 0.1 M NaOH at 0.55 V, c) Peak current vs. pH, and d) peak potential vs. pH.
